# Supplementary material
Source: PubMed Central journal article supplement (PMC4551421)
Supplement: NIHMS611752-supplement-Supplemental_Figure_1.pdf [file NIHMS611752-supplement-Supplemental_Figure_1.pdf]

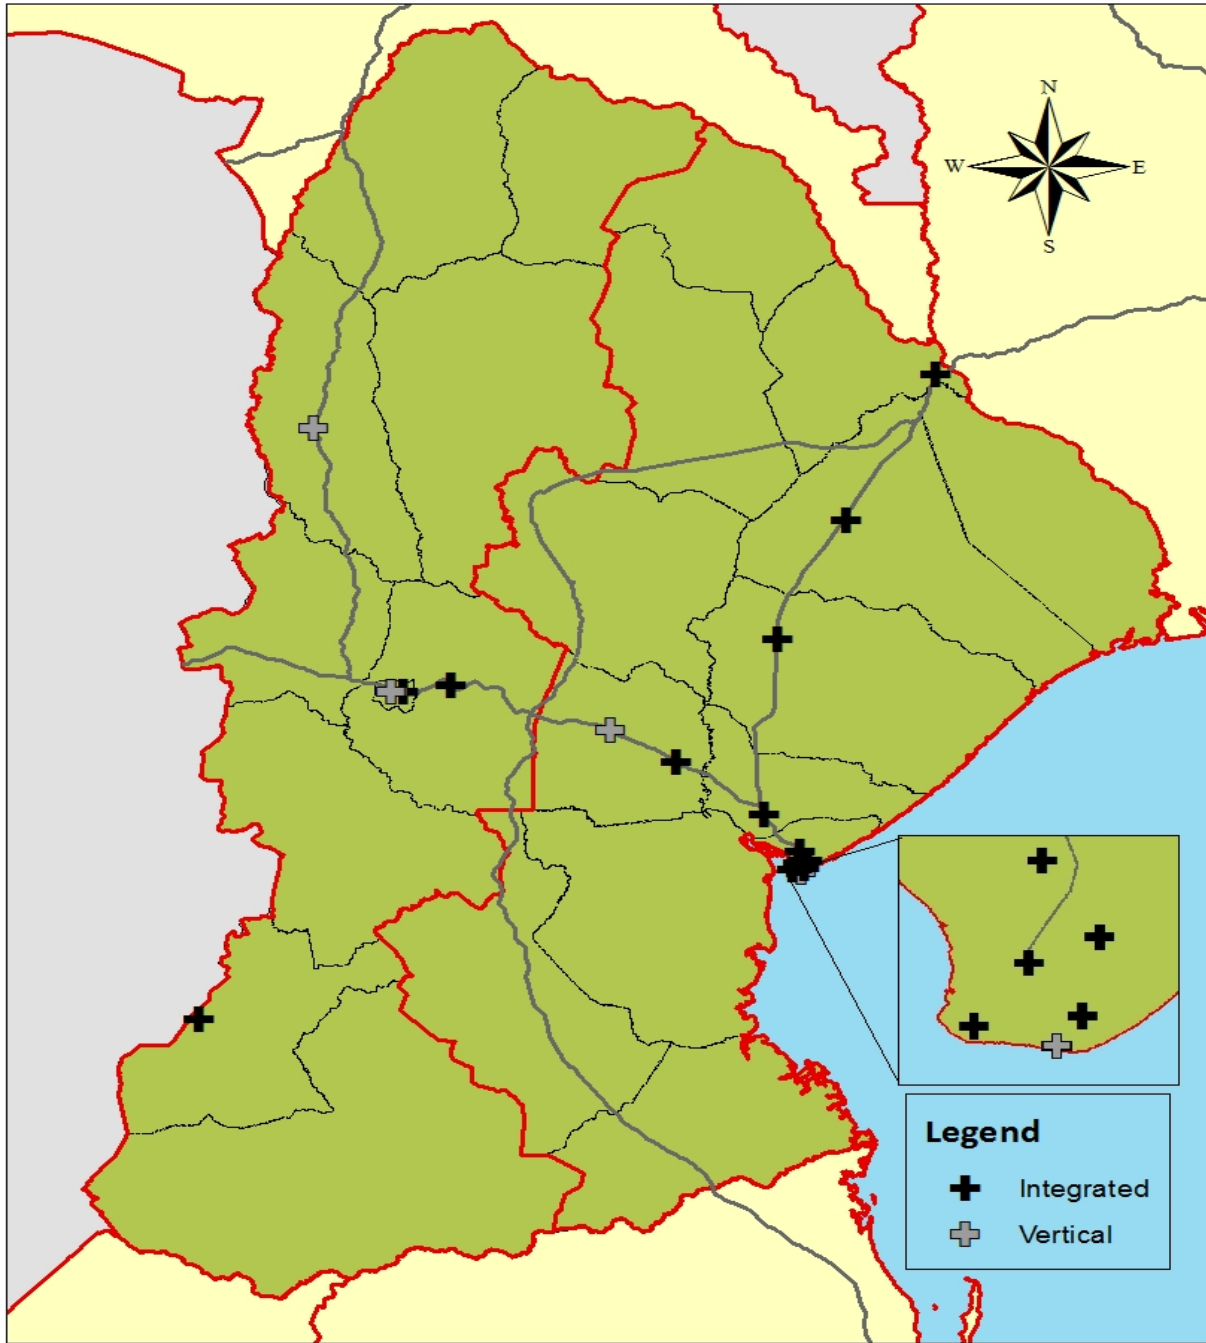

**Supplemental Digital Content - Figure S1.** Map of HIV Treatment Clinics in Manica and Sofala Province Included in the Study
